# Supplementary material for: Interplay between SERCA, 4E-BP, and eIF4E in the Drosophila heart
Source: PubMed Central journal article supplement (PMC9119464; doi:10.1371/journal.pone.0267156), 2022-05-19
Supplement: pone.0267156.s003.pdf [file pone.0267156.s003.pdf]

S1 Table. Analysis of SERCA activity and constant of relaxation Tau.

|                            | <b>Tau</b> | <b>SERCA activity</b> |      |
|----------------------------|------------|-----------------------|------|
| <b>control 7-days-old</b>  | 0.17       | 4.73                  | Mean |
|                            | 0.04       | 1.07                  | SEM  |
|                            | 7.00       | 7.00                  | n    |
| <b>UAS-4EBP 7-days-old</b> | 0.08*      | 11.50*                | Mean |
|                            | 0.01       | 2.06                  | SEM  |
|                            | 12.00      | 12.00                 | n    |
